# Supplementary material for: Proteomic Analysis of Rhizoctonia solani Identifies Infection-specific, Redox Associated Proteins and Insight into Adaptation to Different Plant Hosts
Source: PubMed Central journal article supplement (PMC4824849; doi:10.1074/mcp.m115.054502), 2016-01-25
Supplement: 10.1074_M115.054502_mcp.M115.054502-1.pdf [file 10.1074_M115.054502_mcp.M115.054502-1.pdf]

Supplementary table S1: Primers used for QPCR analysis of gene expression

| Gene         | Primer                | Primer                |
|--------------|-----------------------|-----------------------|
| RSAG8G_00146 | CCTTCACGACGAGGTTCCG   | CTGGAAGTTGCTGCACCC    |
| RSAG8G_00435 | GTGCATCACAGCGTCTGG    | GTGGAGTTCCAAGCCTGC    |
| RSAG8G_00435 | GTGCATCACAGCGTCTGG    | GTGGAGTTCCAAGCCTGC    |
| RSAG8G_00448 | AAGGGTCAATTCGGAGCC    | GATGCTGTGATTGCACCG    |
| RSAG8G_01617 | GGATGAGCTCCTTGCTGC    | GCGTGATATCCACCTGGC    |
| RSAG8G_02244 | GCCAAGCTGGTCAAACC     | CATCAAAGATGGTCCCCG    |
| RSAG8G_02343 | TTTACAATACGCTGCGG     | CCATCTCCTCAAGCGGG     |
| RSAG8G_02727 | ACGGTCAAACCCAGAACG    | AAGCACGGTGAACGACC     |
| RSAG8G_03246 | GTGGACAAAATGCCAGC     | TCAACTTCGTCCAACAGGC   |
| RSAG8G_03280 | TAGCTCGCACTGTCCAAATG  | AACGACCATGGGAAGCATAG  |
| RSAG8G_03830 | CCGCTCCTACTTTGCTCG    | GCCACCAACCAACGTACC    |
| RSAG8G_03874 | CGGACATAGCTTGGGTGG    | TGCCCTGAGCAAGCTACC    |
| RSAG8G_04390 | GACTTGGCTGGTCGATGC    | CCGTTCCGGTACTTGTGCG   |
| RSAG8G_04560 | CTGCCTCGCTTGTTACC     | CAAAGTGGGCGCTTTCC     |
| RSAG8G_05829 | CTCACGTGGTTCTTCGCC    | CATTGCACCGTCTCTCCC    |
| RSAG8G_05942 | TTGTTGGGCACTCTGACG    | ACCACCAAGGTCATTGCC    |
| RSAG8G_05942 | TTGTTGGGCACTCTGACG    | ACCACCAAGGTCATTGCC    |
| RSAG8G_05942 | TTGTTGGGCACTCTGACG    | ACCACCAAGGTCATTGCC    |
| RSAG8G_06044 | CATATGGAAAGCCCCTGG    | CGATGGTGTGATCGTGC     |
| RSAG8G_06853 | ACCAGCTCCGTCAAATCG    | GGCACAGAACAATCGCC     |
| RSAG8G_07318 | ATCTCTGGAGGGTGTGCG    | GACCTACCAATCACGCCG    |
| RSAG8G_07380 | TGAGCTTCTCACCTGCG     | CACCAAGGGTGACAACGG    |
| RSAG8G_07433 | GGTTTGAGGACGTTTGCG    | TTGGAGTTGATGCCAGCC    |
| RSAG8G_07433 | GGTTTGAGGACGTTTGCG    | TTGGAGTTGATGCCAGCC    |
| RSAG8G_07489 | TGCTCCTTCCGATAAGCG    | CCCTCGTTCTGTTTTGCG    |
| RSAG8G_07489 | TGCTCCTTCCGATAAGCG    | CCCTCGTTCTGTTTTGCG    |
| RSAG8G_07504 | GCAACGTCTGGTTCGAGG    | GTTTCGAGTTCACACCCGC   |
| RSAG8G_07504 | GCAACGTCTGGTTCGAGG    | GTTTCGAGTTCACACCCGC   |
| RSAG8G_07875 | AGGAACTGATGGATGCGG    | TGGACTTGCTGTTGTCCG    |
| RSAG8G_08039 | ACGTCGGAGCTCACTTGG    | TGTTAGAGCCGGAGGAGC    |
| RSAG8G_09107 | ATCCTGCTACCTTGCCCG    | CAACTCGTTGACCCGAGC    |
| RSAG8G_09107 | ATCCTGCTACCTTGCCCG    | CAACTCGTTGACCCGAGC    |
| RSAG8G_09852 | TTGTGAGGCGACTGGAGG    | TCACTGGACGATCAGGGG    |
| RSAG8G_10274 | GATCAACTTTGGCAGCCC    | AGATAAAGTGGCCGTCCG    |
| RSAG8G_10341 | CTCTTCTTGCCGGATTGG    | AAGTACCTGCCACAGCGG    |
| RSAG8G_11016 | TGGAGAGACCTCCAACGC    | CTGTGTTCCCTGGTTCGC    |
| RSAG8G_11016 | TGGAGAGACCTCCAACGC    | CTGTGTTCCCTGGTTCGC    |
| RSAG8G_11570 | GCCGTCTTGGGAGAATCC    | CGTGATCCAAGTCGGAGG    |
| RSAG8G_11570 | GCCGTCTTGGGAGAATCC    | CGTGATCCAAGTCGGAGG    |
| RSAG8G_12186 | AATGCGGGTGATACTGGC    | TCAGGAGGGCAGCTAACG    |
| RSAG8G_13658 | ATGCACGGACCTCTCTGG    | TTTGAGCACCCAGGAAGC    |
| RSAG8T_02576 | CCCAGTGAAGAGTATGAGGGC | TCCTTGAGTGAAGTCTTCCGC |

Supplementary table S1 continued.

| Gene                              | Primer                  | Primer                   |
|-----------------------------------|-------------------------|--------------------------|
| RSAG8T_02776                      | CGACCACATCCTCTTTTGGGA   | CCAAATGTGACCGCCAGTTTT    |
| RSAG8T_03274                      | ACTGGAGTGCAGATTGTTTCGT  | TTTCGGTACCTTGGAACCTCG    |
| RSAG8T_03407                      | GACGGTGTCTATTCCCTCGAG   | AACGTGGAATTGTTTGGCTCG    |
| RSAG8T_05194                      | TGCTGCCAACGTTTTCAACTA   | GTAGTGCCGGATGAGATACCA    |
| RSAG8T_05661                      | CGCGGCTTATTGAACGATCTG   | ATGAACATGGCCTTCGACAGT    |
| RSAG8T_06785                      | GCGCGGACATGATTTAATGCT   | CAAACGGCGTCCAAAAGTTCT    |
| RSAG8T_08263                      | TTGCTGAGATGTTGTTGCACG   | AATAGACTGGAAAGGGCGACG    |
| RSAG8T_11272                      | GACCTAGACCAACACGCTCAA   | TCTCGTTCCATTCCAGGTGTG    |
| Scaffold_12_2413_137178_137639_+  | GCAAATTCGAGCAACTGGTGT   | TGGAGAGTGTATGCGCCTTTT    |
| Scaffold_197_1383_46180_46476_-   | TGGGATTTGATGCTAACGGGT   | GATTCTGCAAAGCGACAGTGG    |
| Scaffold_205_243_14147_15250_+    | AGCCTTCCCTAATACGACCCT   | ATCAGGAGACGAGGTAGCAGT    |
| Scaffold_280_1040_12924_13205_-   | GCACGCACATCCAATAAACGG   | CCTCGTCATGCCTTCTCTTCA    |
| Scaffold_58_2876_132842_133237_+  | ATCTACAAGGTTCTCGACGCC   | CGAATCGGTCAGAACACTTGC    |
| Scaffold_8_27139_72994_73251_-    | AACCTGAACCTACCGCGTTC    | CAGCTCACAAGTCAACTGGG     |
| Scaffold_8_27144_72661_72981_-    | GGTGTGTCCTCGTCTCTCTTG   | AGGACCATAGCAAAGGAAGGTG   |
| Scaffold_81_261_10003_10203_+     | TATTGGAGGCGACAACACTACCG | CGACTTCCTCCTTCGTCACAA    |
| Beta-catenin (Control)            | TGGATGAGGACGAGGAGC      | GGCTTGTAGTTGCTGGCG       |
| C3HC4 zinc finger (Control)       | TACCCACAGAGCCTTCGG      | GACATCAACACCTCCGGC       |
| ITS                               | AGAGTTGGTTGTAGCTGGTCC   | CCGTTGTTGAAACTTAGTATTAGA |
| Ribosomal protein L14 (Control)   | ATGCTTGGTCTCAAAGCG      | ACTTTGATCGCTGTTGCC       |
| RNA recognition protein (Control) | AGCCCGAATCTGTTACAG      | GGTCGTTGAAACCCATGC       |
