# Supplementary material for: Proteomic Analysis of Rhizoctonia solani Identifies Infection-specific, Redox Associated Proteins and Insight into Adaptation to Different Plant Hosts
Source: PubMed Central journal article supplement (PMC4824849; doi:10.1074/mcp.m115.054502), 2016-01-25
Supplement: 10.1074_M115.054502_mcp.M115.054502-3.pdf [file 10.1074_M115.054502_mcp.M115.054502-3.pdf]

**Supplementary table S3:** Spectra mapping to different sequences in the *R. solani* and wheat databases..

| Treatment | Tissue           | Time point    | R.solani Protein accession number | R.solani Peptide sequence | Modifications identified by spectrum | Number of unique peptides | Number of total spectra | Spectrum name                           | SEQUEST XCorr score | Mascot Ion score | Wheat entry found              | Wheat Peptide sequence | SEQUEST XCorr score | Mascot Ion score | Comment                      |
|-----------|------------------|---------------|-----------------------------------|---------------------------|--------------------------------------|---------------------------|-------------------------|-----------------------------------------|---------------------|------------------|--------------------------------|------------------------|---------------------|------------------|------------------------------|
| Infection | Membrane         | Early (3 dpi) | RSAG8_03810                       | NSPAIFIDEIDSIAPK          |                                      |                           | 23                      | 42 File10594 Spectrum31123 scans: 33809 | 4.61                | 74.5             | Traes_4DL_D<br>BA53B48C.1      | NAPSIIFIDEIDSIAPK      | 4.35                | 52.9             | 3AA shuffled<br>(SPA vs APS) |
| Infection | Membrane         | Early (3 dpi) | RSAG8_03810                       | NSPAIFIDEIDSIAPK          |                                      |                           | 23                      | 42 File10594 Spectrum31433 scans: 34140 | 4.34                | 60.4             | Traes_4DL_D<br>BA53B48C.1      | NAPSIIFIDEIDSIAPK      | 4.03                | 33.5             | 3AA shuffled<br>(SPA vs APS) |
| Infection | Membrane         | Early (3 dpi) | RSAG8_03810                       | NSPAIFIDEIDSIAPK          |                                      |                           | 23                      | 42 File10594 Spectrum31969 scans: 34726 | 3.68                | 34.2             | Traes_4DL_D<br>BA53B48C.1      | NAPSIIFIDEIDSIAPK      | 3.41                | 31               | 3AA shuffled<br>(SPA vs APS) |
| Infection | Membrane         | Late (7 dpi)  | RSAG8_03810                       | NSPAIFIDEIDSIAPK          |                                      |                           | 20                      | 33 File10602 Spectrum30430 scans: 32990 | 4.86                | 93.4             | Traes_4DL_D<br>BA53B48C.1      | NAPSIIFIDEIDSIAPK      | 4.31                | 58.4             | 3AA shuffled<br>(SPA vs APS) |
| Infection | Membrane         | Early (3 dpi) | RSAG8_03810                       | VLNQILTEMDGMNAK           | Oxidation (+16)                      |                           | 23                      | 42 File10594 Spectrum14006 scans: 15653 | 3.41                | 46.9             | Traes_4DL_D<br>BA53B48C.1      | VLNQILTEMDGMNAK        | 3.41                | 38.1             | Ambiguous<br>AA (I vs L)     |
| Infection | Membrane         | Early (3 dpi) | RSAG8_03810                       | VLNQILTEMDGMNAK           |                                      |                           | 23                      | 42 File10594 Spectrum17448 scans: 19269 | 4.89                | 60               | Traes_4DL_D<br>BA53B48C.1      | VLNQILTEMDGMNAK        | 4.89                | 47.7             | Ambiguous<br>AA (I vs L)     |
| Infection | Membrane         | Late (7 dpi)  | RSAG8_03810                       | VLNQILTEMDGMNAK           | Oxidation (+16)                      |                           | 20                      | 33 File10602 Spectrum12703 scans: 14375 | 4.21                | 70.3             | Traes_4DL_D<br>BA53B48C.1      | VLNQILTEMDGMNAK        | 4.21                | 70.3             | Ambiguous<br>AA (I vs L)     |
| Infection | Membrane         | Late (7 dpi)  | RSAG8_03810                       | VLNQILTEMDGMNAK           | Oxidation (+16)                      |                           | 20                      | 33 File10602 Spectrum8925 scans: 10408  | 4.47                | 63               | Traes_4DL_D<br>BA53B48C.1      | VLNQILTEMDGMNAK        | 4.47                | 54.2             | Ambiguous<br>AA (I vs L)     |
| Infection | Culture filtrate | Late (7 dpi)  | RSAG8_05268                       | YPNSGDGPYAGHIMVSEQK       | Deamidated (+1),<br>Deamidated (+1)  |                           | 3                       | 73 File10590 Spectrum10668 scans: 11961 | 2.62                | 17.5             | Traes_1AL_E9<br>6C0662D.2      | YCSILGTATGGNLDCTOR     | 4.26                | 37.1             |                              |
| Infection | Membrane         | Early (3 dpi) | RSAG8_07749                       | IPIFSAAGLPHNEIAAQICR      | Carbamidomethyl (+57)                |                           | 5                       | 5 File10594 Spectrum19027 scans: 20927  | 4.31                | 61               | tr W5DET9 <br>W5DET9_WH<br>EAT | IPIFSAAGLPHNEIAAQICR   | 4.31                | 45.4             | Ambiguous<br>AA (I vs L)     |
| Infection | Membrane         | Late (7 dpi)  | RSAG8_07749                       | IPIFSAAGLPHNEIAAQICR      | Carbamidomethyl (+57)                |                           | 10                      | 16 File10602 Spectrum17571 scans: 19487 | 4.2                 | 46.4             | tr W5DET9 <br>W5DET9_WH<br>EAT | IPIFSAAGLPHNEIAAQICR   | 4.2                 | 38.2             | Ambiguous<br>AA (I vs L)     |
