# Supplementary material for: Proteomic Analysis of Rhizoctonia solani Identifies Infection-specific, Redox Associated Proteins and Insight into Adaptation to Different Plant Hosts
Source: PubMed Central journal article supplement (PMC4824849; doi:10.1074/mcp.m115.054502), 2016-01-25
Supplement: 10.1074_M115.054502_mcp.M115.054502-7.pdf [file 10.1074_M115.054502_mcp.M115.054502-7.pdf]

Supplementary table S7. The number of proteins putatively associated with carbohydrate active enzyme (CAZy) categories from the culture filtrate samples.

| Family          | Count | Brief description                                                                |
|-----------------|-------|----------------------------------------------------------------------------------|
| AA1             | 4     | Laccases, ferroxidases and laccase-like multicopper oxidases                     |
| AA10            | 2     | Chitin and cellulose cleavage                                                    |
| AA2             | 1     | Class II lignin-modifying peroxidases                                            |
| AA3             | 2     | Glucose-methanol-choline (GMC) oxidoreductases                                   |
| AA3 AA8         | 2     | GMC oxidoreductases and Iron reductase domains                                   |
| AA5             | 5     | Glyoxal oxidases or galactose oxidases                                           |
| AA7             | 1     | Glucooligosaccharide oxidases                                                    |
| AA8             | 1     | Iron reductase domain                                                            |
| AA9             | 5     | Cellulose cleavage                                                               |
| AA9 CBM1        | 3     | Cellulose-binding module                                                         |
| CBM12 GH18      | 1     | Chitin-binding module, chitinase                                                 |
| CBM12 GH19 CBM5 | 1     | Chitin-binding module, chitinase                                                 |
| CBM13           | 15    | Carbohydrate-binding                                                             |
| CBM14           | 1     | Chitin-binding module                                                            |
| CBM20           | 1     | Starch-binding domain                                                            |
| CBM20 GH15      | 5     | Starch-binding domain                                                            |
| CBM63           | 3     | Cellulose binding module                                                         |
| CE10            | 3     | Esterase activity                                                                |
| CE4             | 13    | Deacetylase/esterase activity                                                    |
| GH103           | 2     | Peptidoglycan lytic transglycosylase                                             |
| GH13            | 1     | Amylase                                                                          |
| GH16            | 7     | Glycoside Hydrolase                                                              |
| GH18            | 3     | chitinases and non-catalytic proteins such as xylanase inhibitor                 |
| GH2             | 4     | Glycoside Hydrolase                                                              |
| GH31            | 1     | Glycoside Hydrolase                                                              |
| GH38            | 1     | Mannosidase                                                                      |
| GH43            | 2     | Glycoside Hydrolase                                                              |
| GH47            | 2     | Mannosidase                                                                      |
| GH5             | 3     | Glycoside Hydrolase                                                              |
| GH7             | 3     | Cellobiohydrolases                                                               |
| GH72 CBM43      | 3     | $\beta$ -1,3-glucanosyltransglycosylase, $\beta$ -1,3-glucan binding module      |
| GH76            | 1     | $\alpha$ -1,6-mannanase                                                          |
| GH88            | 1     | d-4,5-unsaturated $\beta$ -glucuronyl hydrolase                                  |
| GT2             | 1     | Includes cellulose synthase and chitin synthase                                  |
| GT34            | 1     | Glycosyltransferase                                                              |
| GT35            | 2     | Glycogen or starch phosphorylase                                                 |
| GT4             | 1     | Glycosyltransferase                                                              |
| GT41            | 1     | Glycosyltransferase                                                              |
| GT66            | 1     | Protein glycotransferase, utilize a lipid-diphospho-oligosaccharide as the donor |
| GT74            | 1     | $\alpha$ -1,2-L-fucosyltransferase                                               |
| GT90            | 2     | Glycosyltransferase                                                              |
| PL3             | 1     | Pectate lyase                                                                    |
| PL8             | 2     | Hyaluronate lyase                                                                |
